# Supplementary material for: Rationale and design of the African group A streptococcal infection registry: the AFROStrep study
Source: PubMed Central journal article supplement — BMJ Open. 2016 Feb 25;6(2):e010248. doi: 10.1136/bmjopen-2015-010248 (PMC4769387; doi:10.1136/bmjopen-2015-010248), 2016-02-25
Supplement: bmjopen-2015-010248supp.pdf [file bmjopen-2015-010248supp.pdf]

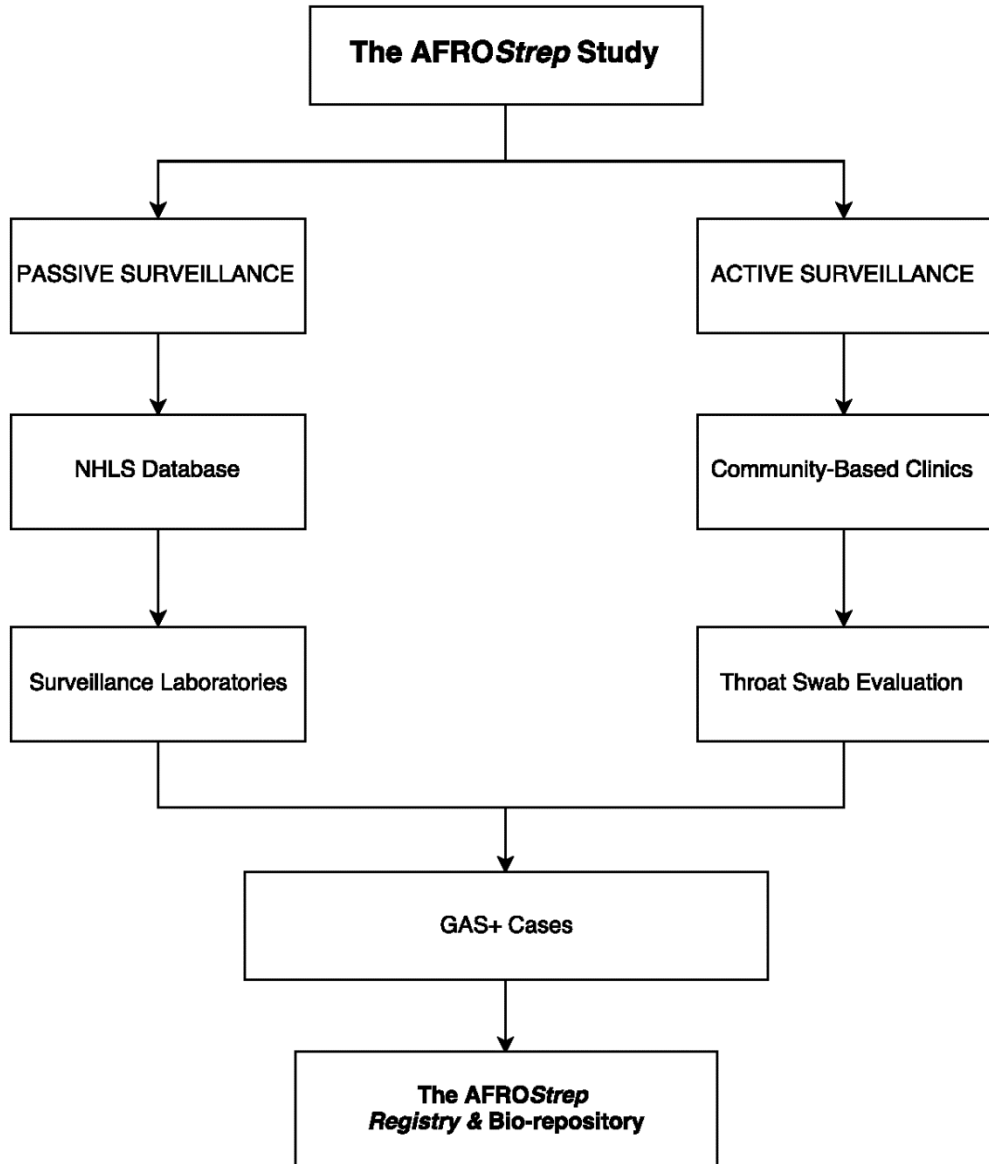

Site ID   

 Participant number    
**Patient Data**

|                                                       |                      |                                                       |                      |
|-------------------------------------------------------|----------------------|-------------------------------------------------------|----------------------|
| 1 Enrolment Date                                      | <input type="text"/> | 5 Age                                                 | <input type="text"/> |
| 2 Clinic name                                         | <input type="text"/> | 6 Gender                                              | <input type="text"/> |
| 3 Clinic folder #                                     | <input type="text"/> | 7 Race                                                | <input type="text"/> |
| 4 Date of birth                                       | <input type="text"/> | 8 Place of residence                                  | <input type="text"/> |
| Antibiotics administered in the last 30 days?         |                      | Informed consent obtained?                            |                      |
| <input type="checkbox"/> N <input type="checkbox"/> Y |                      | <input type="checkbox"/> N <input type="checkbox"/> Y |                      |

**Pharyngitis**

|                          |                                                       |                                          |                                                                                          |
|--------------------------|-------------------------------------------------------|------------------------------------------|------------------------------------------------------------------------------------------|
| 1 Cough                  | <input type="checkbox"/> N <input type="checkbox"/> Y | 8 Exudate on the tonsils                 | <input type="checkbox"/> N <input type="checkbox"/> Y                                    |
| 2 Rhinorrhoea            | <input type="checkbox"/> N <input type="checkbox"/> Y | 9 Oropharyngeal candidiasis              | <input type="checkbox"/> N <input type="checkbox"/> Y                                    |
| 3 Hoarseness             | <input type="checkbox"/> N <input type="checkbox"/> Y | 10 Tender anterior cervical node         | <input type="checkbox"/> N <input type="checkbox"/> Y                                    |
| 4 Temperature > 38C      | <input type="checkbox"/> N <input type="checkbox"/> Y | 11 Ant cervical node > 1.5cm in diameter | <input type="checkbox"/> N <input type="checkbox"/> Y                                    |
| 5 Tonsillar erythema     | <input type="checkbox"/> N <input type="checkbox"/> Y | 12 Rash                                  | <input type="checkbox"/> N <input type="checkbox"/> Y                                    |
| 6 Tonsilla swelling      | <input type="checkbox"/> N <input type="checkbox"/> Y | 13 Conjunctivitis                        | <input type="checkbox"/> N <input type="checkbox"/> Y                                    |
| 7 Exudate on the pharynx | <input type="checkbox"/> N <input type="checkbox"/> Y | 14 Rapistrep                             | <input type="checkbox"/> Neg <input type="checkbox"/> Pos <input type="checkbox"/> Ndone |
| Time of swab collection  |                                                       | <input type="text"/>                     |                                                                                          |

**Invasive GAS**

|                                |                                                                                 |
|--------------------------------|---------------------------------------------------------------------------------|
| Diagnosis: _____               | Date of onset: <u>yyyy/mm/dd</u>                                                |
| <b>Specimen isolated from:</b> | <b>Clinical presentation:</b>                                                   |
| Blood                          | <input type="checkbox"/> N <input type="checkbox"/> Y Bacteraemia               |
| Joint                          | <input type="checkbox"/> N <input type="checkbox"/> Y Septic arthritis          |
| Deep tissue                    | <input type="checkbox"/> N <input type="checkbox"/> Y Toxic shock-like syndrome |
| CSF                            | <input type="checkbox"/> N <input type="checkbox"/> Y Necrotising fasciitis     |
| Abscess                        | <input type="checkbox"/> N <input type="checkbox"/> Y Pneumonia                 |
| Bone                           | <input type="checkbox"/> N <input type="checkbox"/> Y Erysipelas                |
| Other sterile site?            | <input type="checkbox"/> N <input type="checkbox"/> Y Other                     |
| <i>Please specify:</i>         | <i>Please specify:</i>                                                          |
| _____                          | _____                                                                           |

**Clinical Management**

|                                                                  |                                                                                        |                                                                     |
|------------------------------------------------------------------|----------------------------------------------------------------------------------------|---------------------------------------------------------------------|
| Admitted to ICU?                                                 | <input type="checkbox"/> N <input type="checkbox"/> Y <input type="checkbox"/> Unclear | <i>If YES, number of days spent in ICU following GAS isolation?</i> |
| Surgical intervention                                            | <input type="checkbox"/> N <input type="checkbox"/> Y <input type="checkbox"/> Unclear | <i>If YES, number of days spent in ICU following GAS isolation?</i> |
| Outcome (one week after GAS isolation) : <i>alive/RIP/unsure</i> |                                                                                        |                                                                     |
| If RIP: date of death <i>(dd/mm/yyyy)</i>                        |                                                                                        |                                                                     |
| RIP - GAS as main cause of death                                 | <input type="checkbox"/>                                                               |                                                                     |
| RIP - GAS contributed                                            | <input type="checkbox"/>                                                               |                                                                     |
| RIP - GAS contribution unknown                                   | <input type="checkbox"/>                                                               |                                                                     |
| RIP - GAS did not contribute (cause unknown)                     | <input type="checkbox"/>                                                               |                                                                     |
| RIP - GAS did not contribute (cause known)                       | <input type="checkbox"/>                                                               |                                                                     |

|                        |             |
|------------------------|-------------|
| Person completing form | (Signature) |
|------------------------|-------------|

|                                    |               |          |         |          |
|------------------------------------|---------------|----------|---------|----------|
| <i>For Coordinating Centre Use</i> | Awaiting Info | Complete | Entered | Verified |
|------------------------------------|---------------|----------|---------|----------|
